# Supplementary material for: Clinical Characteristics, Genetic Findings and Arrhythmic Outcomes of Patients with Catecholaminergic Polymorphic Ventricular Tachycardia from China: A Systematic Review
Source: MDPI journal article supplement (doi:10.3390/life12081104), 2022-07-22
Supplement: s1 [file s1]

**Supplementary Table S2.** Details on the diagnostic criteria met for individual CPVT patients. The criteria proposed by the 2013 HRS/EHRA/APHRS expert consensus statement were used:

1. CPVT is diagnosed in the presence of a structurally normal heart, normal ECG, and unexplained exercise or catecholamine-induced bidirectional VT, polymorphic ventricular premature beats or VT in individuals <40 years of age.
2. CPVT is diagnosed in patients (index case or family member) who have a pathogenic mutation.
3. CPVT is diagnosed in family members of a CPVT index case with a normal heart who manifests exercise-induced PVCs or bidirectional/polymorphic VT.
4. CPVT can be diagnosed in the presence of a structurally normal heart and coronary arteries, normal ECG, and unexplained exercise or catecholamine-induced bidirectional VT, polymorphic ventricular premature beats or VT in individuals >40 years of age.

| Case number             | Criteria 1              | Criteria 2                                     | Criteria 3 | Criteria 4 |
|-------------------------|-------------------------|------------------------------------------------|------------|------------|
| CNChen202001            | 1                       | - (no further detail on mutation was provided) | 0          | 0          |
| CNDuan201801            | 1                       | VUS                                            | 0          | 0          |
| CNGao201801 (Proband)   | 1                       | 1 (likely pathogenic)                          | 0          | 0          |
| CNGao201802 (Brother 1) | 1                       | VUS                                            | 1          | 0          |
| CNGao201803 (Brother 2) | 1                       | VUS                                            | 1          | 0          |
| CNGe201701              | 1                       | 0 (likely benign)                              | 0          | 0          |
| CNGe201702              | 1                       | VUS                                            | 0          | 0          |
| CNGe201703              | 1                       | 1                                              | 0          | 0          |
| CNGe201704              | 1                       | VUS                                            | 0          | 0          |
| CNGe201705              | 0                       | 0 (likely benign)                              | 0          | 0          |
| CNGe201706              | 0                       | VUS                                            | 0          | 0          |
| CNGe201707              | 0                       | VUS                                            | 0          | 0          |
| CNGe201708              | 1                       | VUS                                            | 0          | 0          |
| CNGe201709              | 1                       | 0                                              | 0          | 0          |
| CNGe201710              | 1                       | VUS                                            | 0          | 0          |
| CNGe201711              | 1                       | - (not done)                                   | 0          | 0          |
| CNHou201901             | 1                       | VUS                                            | 0          | 0          |
| CNLiQ201901 (Family 1)  | 1                       | 1 (likely pathogenic)                          | 0          | 0          |
| CNLiQ201902 (Family 1)  | 1                       | 1 (likely pathogenic)                          | 1          | 0          |
| CNLiQ201903 (Family 1)  | 1                       | 1 (likely pathogenic)                          | 1          | 0          |
| CNLiQ201904 (Family 2)  | 1                       | VUS                                            | 0          | 0          |
| CNLiQ201905 (Family 3)  | 1                       | VUS                                            | 0          | 0          |
| CNLiQ201906 (Family 4)  | 1                       | VUS                                            | 0          | 0          |
| CNLiZ201901             | - (no details provided) | - (not done)                                   | 0          | 0          |
| CNLiZ201902             | - (no details provided) | - (no further detail on mutation was provided) | 0          | 0          |

|                       |                         |                                                |                                                  |   |
|-----------------------|-------------------------|------------------------------------------------|--------------------------------------------------|---|
| CNLiZ201903           | - (no details provided) | - (no further detail on mutation was provided) | 0                                                | 0 |
| CNLiZ201904           | - (no details provided) | - (no further detail on mutation was provided) | 0                                                | 0 |
| CNLiZ201905           | - (no details provided) | - (no further detail on mutation was provided) | 0                                                | 0 |
| CNLin201802 (Sister)  | 0                       | VUS                                            | - (proband with unknown diagnosis)               | 0 |
| CNLin201805 (Father)  | 0                       | VUS                                            | - (proband with unknown diagnosis)               | 1 |
| CNShe202001           | 1                       | VUS                                            | 0                                                | 0 |
| CNXie201901 (Proband) | 1                       | VUS                                            | 0                                                | 0 |
| CNXiong201801         | 1                       | VUS                                            | 0                                                | 0 |
| CNYang202101          | - (no details provided) | VUS                                            | 0                                                | 0 |
| CNYang202102          | - (no details provided) | VUS                                            | 0                                                | 0 |
| CNZhang201901         | 1                       | VUS                                            | 0                                                | 0 |
| CNZhao201201          | 0                       | - (no further detail on mutation was provided) | 0                                                | 0 |
| CNZhao201202          | 0                       | - (no further detail on mutation was provided) | 0                                                | 0 |
| CNZhao201203          | 0                       | - (no further detail on mutation was provided) | 0                                                | 0 |
| CNZhao201204          | 0                       | - (no further detail on mutation was provided) | 0                                                | 0 |
| CNZhao201205          | 0                       | - (no further detail on mutation was provided) | 0                                                | 0 |
| CNZhao201206          | 0                       | - (no further detail on mutation was provided) | 0                                                | 0 |
| CNLee202101           | 1                       | 1                                              | 0                                                | 0 |
| CNLee202102           | 1                       | 1                                              | 0                                                | 0 |
| CNLee202103           | 1                       | 1                                              | 0                                                | 0 |
| CNLee202104           | 1                       | 1                                              | 0                                                | 0 |
| CNLee202105           | 0                       | 1                                              | 1 (brother, mother, maternal granduncle)         | 0 |
| CNLee202106           | 1                       | 1                                              | 1 (brother, mother – not related to CNLee202105) | 0 |
| CNLee202107           | 1                       | 1                                              | 0                                                | 0 |
| CNLee202108           | 1                       | 1                                              | 0                                                | 0 |
| CNLee202109           | 1                       | 0                                              | 0                                                | 0 |
| CNLee2021010          | 1                       | 1                                              | 0                                                | 0 |
| CNLee2021011          | 0                       | 1                                              | 1 (father, sister)                               | 0 |
| CNLee2021012          | 1                       | 1                                              | 0                                                | 0 |
| CNLee2021013          | 1                       | 0                                              | 0                                                | 0 |
| CNLee2021014          | 1                       | 1                                              | 0                                                | 0 |
| CNLee2021015          | 1                       | 1                                              | 0                                                | 0 |
| CNLee2021016          | 1                       | 1                                              | 0                                                | 0 |
